# Supplementary material
Source: PubMed Central journal article supplement (PMC3406121)
Supplement: AEM.01357-12_zam999103532so1.pdf [file AEM.01357-12_zam999103532so1.pdf]

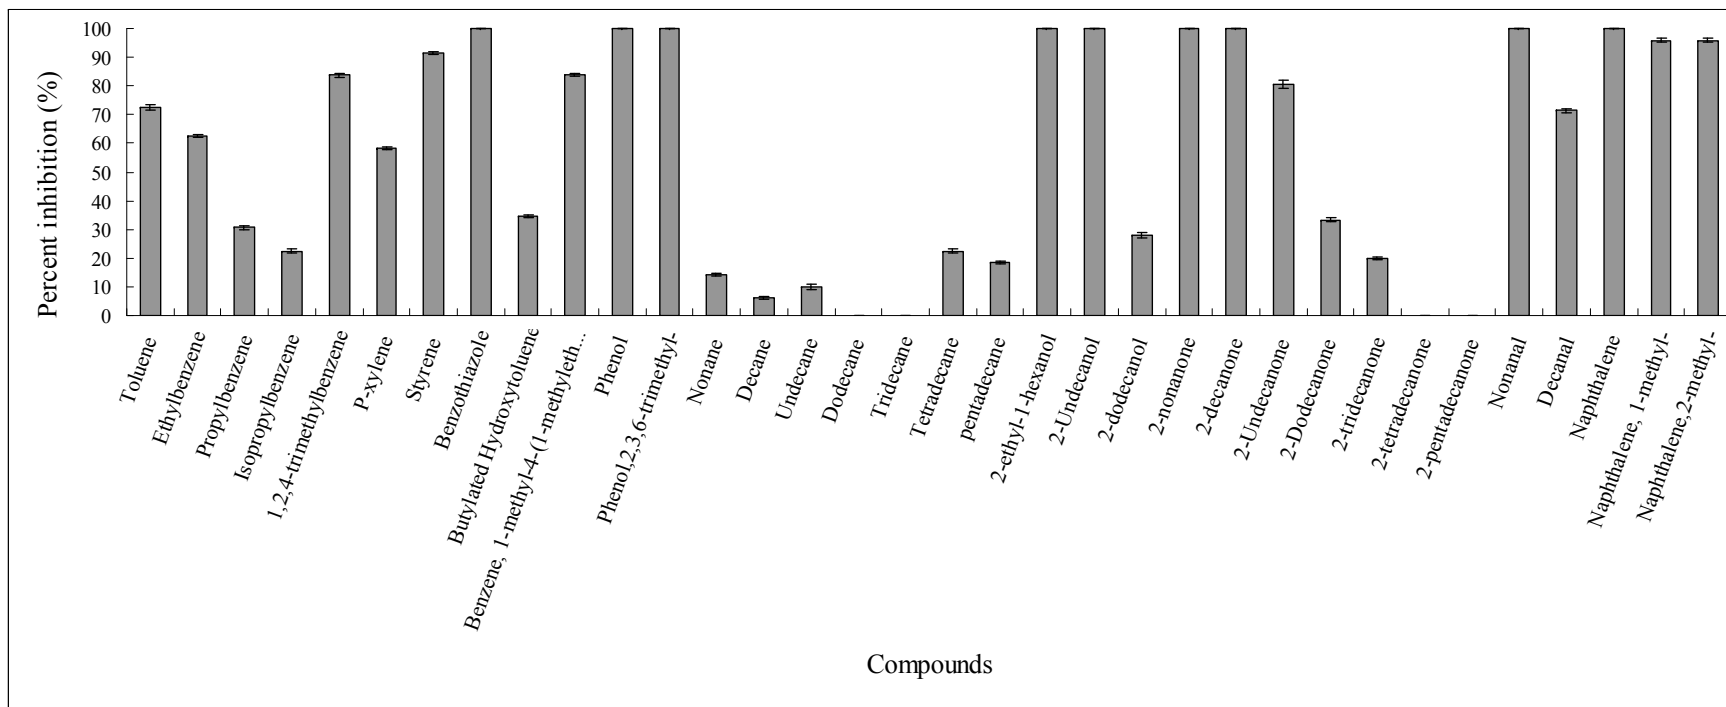

210  
211  
212  
213  
214

Fig. S1 Antifungal activity assays of each volatile on divided plates. The compounds, identified through GC-MS analysis and used in this assay, were synthetic chemicals that were evaluated by adding 200 µl of each compound to sterile filter paper discs placed on divided plates.

| <i>benzenes</i> |                                         | <i>alkyls</i>  |                    | <i>alcohols</i> |                    | <i>ketones</i>   |                           | <i>aldehydes</i> |          |
|-----------------|-----------------------------------------|----------------|--------------------|-----------------|--------------------|------------------|---------------------------|------------------|----------|
| Retention time  | compound                                | Retention time | compound           | Retention time  | compound           | Retention time   | compound                  | Retention time   | compound |
| 1.71            | Toluene                                 | 4.34           | Nonane             | 6.85            | 2-ethyl-1-hexanol  | 7.87             | 2-nonanone.               | 8.05             | Nonanal  |
| 3.45            | Ethylbenzene                            | 6.30           | Decane             | 10.91           | 2-Undecanol        | 8.94             | 2-decanone                | 9.58             | Decanal  |
| 3.63            | P-xylene                                | 8.35           | Undecane           | <b>11.84</b>    | <b>2-dodecanol</b> | <b>10.80</b>     | <b>2-undecanone</b>       |                  |          |
| 4.09            | Styrene                                 | 9.49           | Dodecane           |                 |                    | <b>11.65</b>     | <b>2-dodecanone</b>       |                  |          |
| 5.37            | n-propylbenzene                         | 10.87          | Tridecane          |                 |                    | <b>12.92</b>     | <b>2-tridecanone</b>      |                  |          |
| 5.53            | Isopropylbenzene                        | <b>12.17</b>   | <b>Tetradecane</b> |                 |                    | <b>14.20</b>     | <b>2-tetradecanone</b>    |                  |          |
| 5.66            | 1,2,4-trimethylbenzene                  | <b>13.41</b>   | <b>Pentadecane</b> |                 |                    | <b>15.02</b>     | <b>2-pentadecanone</b>    |                  |          |
| <b>6.13</b>     | <b>Phenol</b>                           |                |                    |                 |                    |                  |                           |                  |          |
|                 |                                         | <i>esters</i>  |                    | <i>ethers</i>   |                    | <i>naphthyls</i> |                           |                  |          |
| 7.69            | Benzene,<br>1-methyl-4-(1-methylethyl)- | Retention time | compound           | Retention time  | compound           | Retention time   | compound                  |                  |          |
| 9.80            | Benzothiazole                           | 9.40           | Methylsalicylate   | 4.54            | 2-Butoxy ethanol   | 9.18             | Naphthalene               |                  |          |
| <b>10.31</b>    | <b>Phenol,2,3,6-trimethyl-</b>          |                |                    |                 |                    | 10.74            | Naphthalene,2-methyl-     |                  |          |
| <b>13.57</b>    | <b>Butylated Hydroxytoluene</b>         |                |                    |                 |                    | 10.97            | Naphthalene,<br>1-methyl- |                  |          |

215

216 Table. S1 Volatile organic compounds were extracted by SPME and identified through GC-MS. Overall, 36 identified compounds and their  
217 retention times in GC chromatogram were listed in the table. The compounds with high concentration were in bold text.
